# Supplementary material for: Enhancing electrochemical properties of a two-dimensional zeolitic imidazole framework by incorporating a conductive polymer for dopamine detection
Source: Royal Society of Chemistry journal article supplement (doi:10.1039/d3an00588g), 2023-01-01
Supplement: d3an00588g1.pdf [file d3an00588g1.pdf]

## Supporting information

### **Enhancing electrochemical properties of two-dimensional zeolitic imidazole framework by incorporating conductive polymer for dopamine detection**

Jing Liu,<sup>a</sup> Bing Yin,<sup>\*a</sup> Xiaobo Liu,<sup>a</sup> Cheng Yang,<sup>a</sup> Shiyu Zang,<sup>a</sup> Shuo Wu<sup>\*a</sup>

<sup>a</sup> School of Chemistry, Dalian University of Technology, Dalian 116023, PR, China.

\*E-mail: Bingyin@dlut.edu.cn; wushuo@dlut.edu.cn

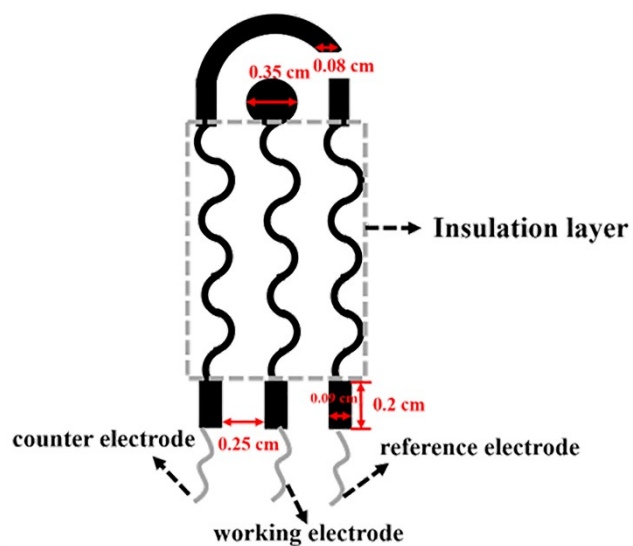

**Fig. S1** Schematic diagram of screen printing electrode size (250 mesh count, 0.4 mm wire diameter, standard mesh tension, 68  $\mu\text{m}$  mesh thickness).

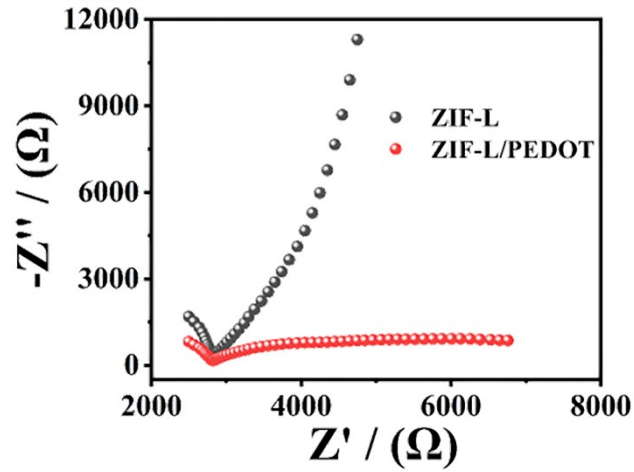

**Fig. S2** Electrochemical impedance spectra of ZIF-L and ZIF-L/PEDOT electrodes in 10 mM  $\text{Fe}(\text{CN})_6^{3-/4-}$  containing 0.1 M KCl frequency range from  $10^5$  to  $10^{-1}$  Hz with amplitude of 5 mV at direct current bias potential of 0.24V.

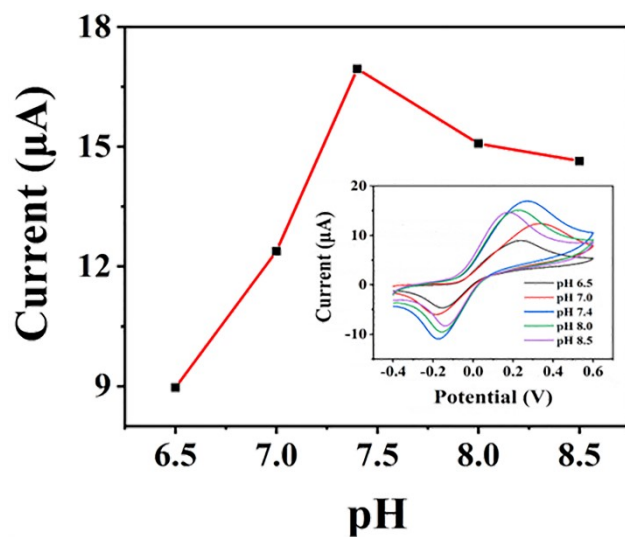

**Fig. S3** CV curves peak current of ZIF-L/PEDOT at 300  $\mu\text{M}$  DA in different pH, Scan rate: 50  $\text{mV s}^{-1}$ , Inset: CV curves at different pH.

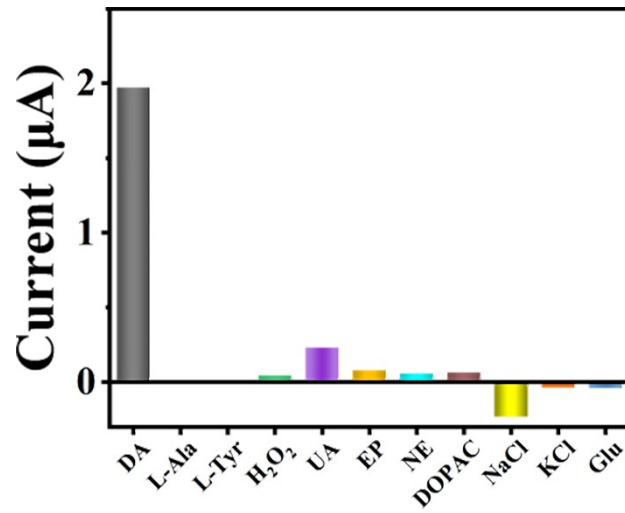

**Fig. S4** The corresponding response current of ZIF-L/PEDOT exposed to DA and other interferences.

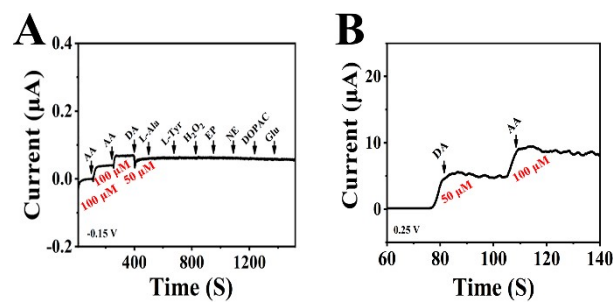

**Fig. S5** Interference test of ZIF-L/PEDOT electrode for (A)  $100\ \mu\text{M}$  AA,  $50\ \mu\text{M}$  DA and  $500\ \mu\text{M}$  L-Ala,  $500\ \mu\text{M}$  L-Tyr,  $500\ \mu\text{M}$   $\text{H}_2\text{O}_2$ ,  $500\ \text{nM}$  EP,  $500\ \text{nM}$  NE,  $500\ \text{nM}$  DOPAC, and  $5\ \text{mM}$  Glu in  $0.01\ \text{M}$  PBS at  $-0.15\text{ V}$ , (B)  $50\ \mu\text{M}$  DA and  $100\ \mu\text{M}$  AA in  $0.01\ \text{M}$  PBS at  $0.25\text{ V}$ .

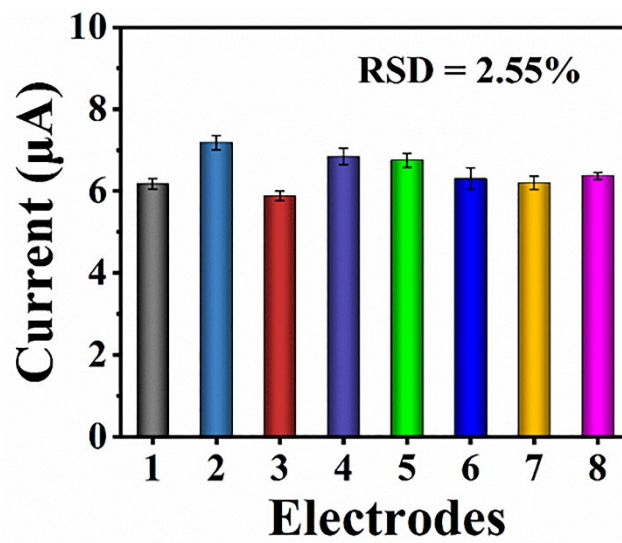

**Fig. S6** Reproducible current response of eight ZIF-L/PEDOT electrodes in 0.01 M PBS containing 300 µM DA.

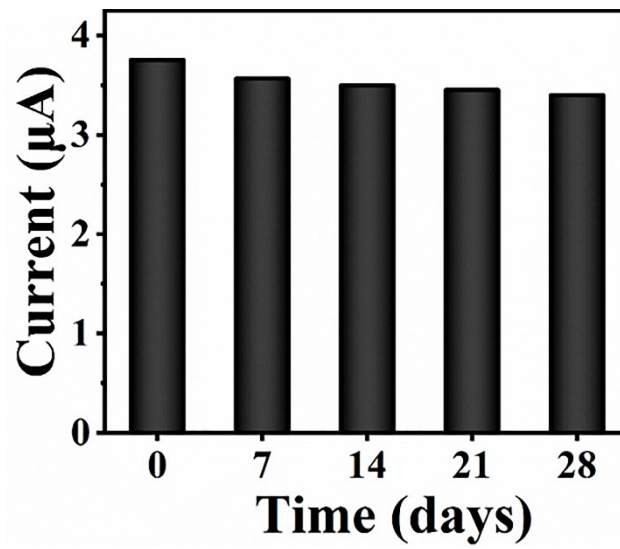

**Fig. S7** Current response of 100  $\mu\text{M}$  DA after 0, 7, 14, 21, 28 days in 0.01 M PBS.
